# Supplementary material for: Water assisted atomic layer deposition of yttrium oxide using tris(N,N′-diisopropyl-2-dimethylamido-guanidinato) yttrium(iii): process development, film characterization and functional properties
Source: Royal Society of Chemistry journal article supplement (doi:10.1039/c7ra13417g), 2018-01-01
Supplement: c7ra13417g1.pdf [file c7ra13417g1.pdf]

## Supporting Information

### **Water Assisted Atomic Layer Deposition of Yttrium Oxide Using Tris(*N,N'*-diisopropyl-2-dimethylamido-guanidinato) Yttrium(III): Process Development, Film Characterization and Functional Properties**

Lukas Mai,<sup>a†</sup> Nils Boysen,<sup>a†</sup> Ersoy Subaşı,<sup>b</sup> Teresa de los Arcos,<sup>c</sup> Detlef Rogalla,<sup>d</sup> Guido Grundmeier,<sup>c</sup> Claudia Bock,<sup>e</sup> Hong-Liang Lu<sup>f</sup> and Anjana Devi<sup>a\*</sup>

---

<sup>a</sup> *Inorganic Materials Chemistry, Ruhr-University Bochum, 44801 Bochum, Germany. Email: anjana.devi@rub.de*

<sup>b</sup> *Werkstoffe und Nanoelektronik, Ruhr-Universität Bochum, 44801 Bochum, Germany*

<sup>c</sup> *Macromolecular and Technical Chemistry, University of Paderborn, 33098 Paderborn, Germany*

<sup>d</sup> *RUBION, Ruhr-University Bochum, 44801 Bochum, Germany*

<sup>e</sup> *Mikrosystemtechnik, Ruhr-Universität Bochum, 44801 Bochum, Germany*

<sup>f</sup> *Institute of Advanced Nanodevices, School of Microelectronics, Fudan University, Shanghai 200433, China*

### Synthesis of Tris(*N,N'*-diisopropyl-2-dimethylamido-guanidinato) Yttrium(III):

A suspension of LiNMe<sub>2</sub> (1.76 g, 34.5 mmol, Sigma-Aldrich, 95 % purity) in Et<sub>2</sub>O (60 mL) was cooled to -20 °C. To this suspension, a mixture of *N,N*-diisopropylcarbodiimide (4.35 g, 34.5 mmol, Acros Organics, 99 % purity) and Et<sub>2</sub>O (50 ml) were added dropwise and the mixture was allowed to warm up to room temperature and stirred for 24 h under argon atmosphere. The resulting pale-yellow solution of lithium diisopropyl guanidinate was transferred by a Teflon cannula in small portions to a suspension of YCl<sub>3</sub> (2.23 g, 11.45 mmol, ABCR, 99.9 % purity) in Et<sub>2</sub>O (120 ml), which was cooled to 0 °C. The resulting mixture was allowed to warm to room temperature and stirring was continued for 48 h. The solvent was completely removed under vacuum, affording a slightly yellow solid. The crude product was extracted in hexane, which was then filtered through a Teflon cannula equipped with a Whatman filter to afford a pale-yellow solution. This solution was concentrated under vacuum. Spectroscopically pure colorless product in form of crystals were obtained from this concentrated solution after storage in a freezer at -20 °C overnight. Yield 4.82 g (70 %, based on YCl<sub>3</sub>). Anal. Calc. for C<sub>27</sub>H<sub>60</sub>N<sub>9</sub>Y [%]: C, 54.07; H, 10.08; N, 21.02; Y, 14.82. Found [%]: C, 53.38; H, 10.58; N, 20.77. <sup>1</sup>H NMR (200 MHz, Benzene-d<sub>6</sub>) δ [ppm] = 3.60 (septd, J = 6.3, 1.7 Hz, 2H), 2.63 (s, 6H), 1.47 (d, J = 6.4 Hz, 7H), 1.29 (d, J = 6.2 Hz, 6H). <sup>13</sup>C NMR (50 MHz, C<sub>6</sub>D<sub>6</sub>) δ [ppm] = 172.32, 46.59, 40.33, 27.10, 26.61. EI- MS (70 eV): m/z (rel. int. [%]) = 599.52 (3.82 %, M+ = YL<sub>3</sub>+), 429.25 (13.93 %, YL<sub>2</sub>+), 385.2 (8.46 %, YL<sub>2</sub>+ - iPr), 258.09 (5.71 %, YL+). IR (ATR, [cm<sup>-1</sup>]): 2935.8 (m), 1433 (s), 1374.7 (s), 1363.3 (s), 1346.2 (m), 1323.5 (m), 1304.9 (m), 1172.6 (m), 1158.4 (m), 1125.7 (m), 1111.4 (m), 1033.2 (s), 443.9 (w), 688.8 (w), 728.6 (w).

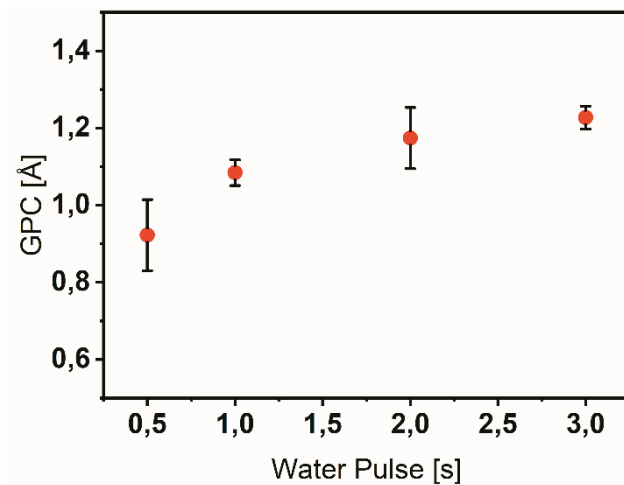

Figure S 1. The dependence between the water pulse times and GPC of the thin film at 225 °C.

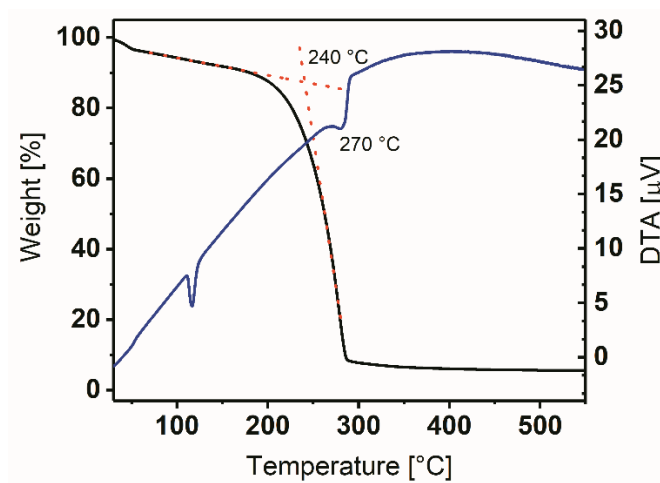

Figure S 2. Thermogravimetric (black curve) and differential thermal analysis (blue curve) for  $[Y(DPDMG)_3]$ .

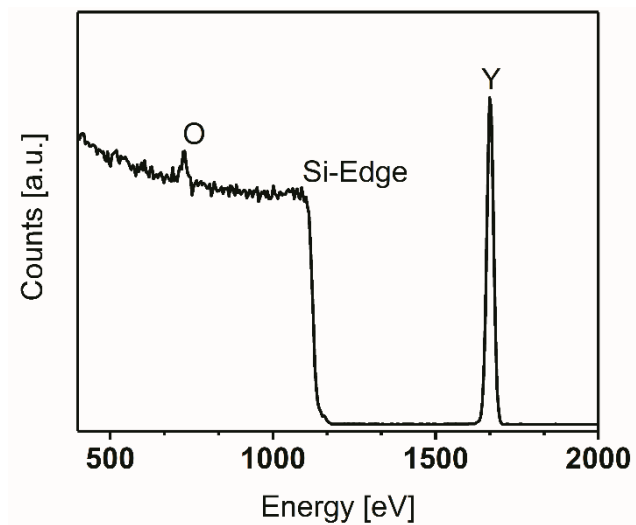

Figure S 3. RBS/NRA spectrum from a 30 nm  $Y_2O_3$  thin film deposited on Si(100) at 225 °C.

Table S 1. Compositional analysis derived from XPS measurements for a 30 nm  $Y_2O_3$  thin film deposited at 225 °C.

| Analyzed Species | As introduced<br>[at.%] | Sputtered<br>[at.%] |
|------------------|-------------------------|---------------------|
| Carbon           | 35.4                    | 2.6                 |
| Nitrogen         | 0.3                     | --                  |
| Silicon          | 2.6                     | --                  |
| Yttrium          | 21.9                    | 43.5                |
| Oxygen           | 39.7                    | 54.0                |
| O/Y – Ratio      | 1.8                     | 1.2                 |

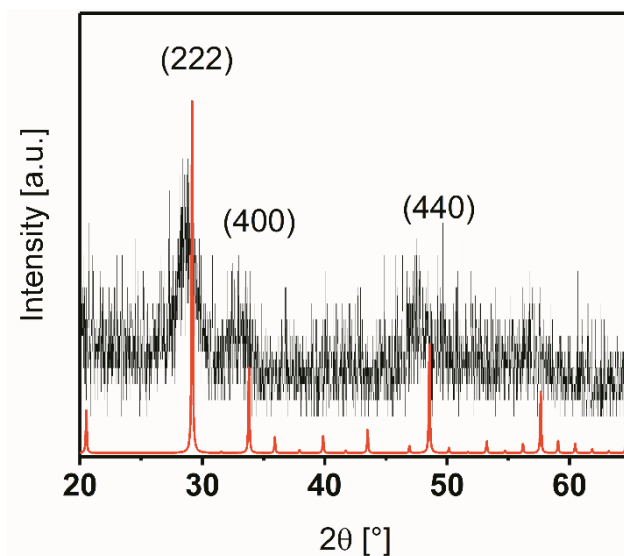

Figure S 4. GI-XRD of a 30 nm  $\text{Y}_2\text{O}_3$  thin film deposited at 200 °C on Si(100). The red pattern indicates the calculated powder XRD pattern of cubic  $\text{Y}_2\text{O}_3$  (ICSD 185295).

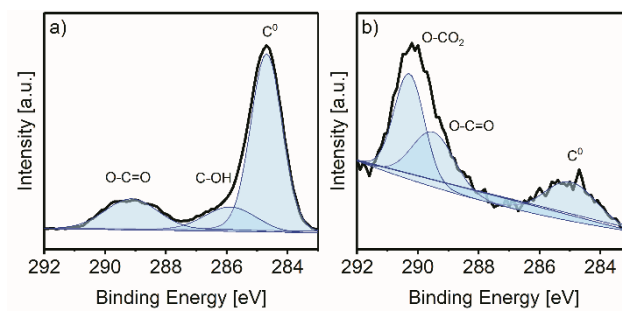

Figure S 5. a) Normalized XPS C1s core spectrum before sputtering. b) Normalized XPS C1s core spectrum after sputtering. The black curve indicates the measured core, while the blue curve shows the fitted data.
